# Supplementary material for: Highly Efficient NO2 Sensors Based on Al-ZnOHF under UV Assistance
Source: MDPI journal article supplement (doi:10.3390/ma16093577), 2023-05-07
Supplement: s1 [file s1]

Supporting information for:

## Highly Efficient NO<sub>2</sub> Sensors Based on Al-ZnOHF under UV Assistance

Xingyu Yao <sup>1</sup>, Rutao Wang <sup>1</sup>, Lili Wu <sup>1,\*</sup>, Haixiang Song <sup>2</sup>, Jinbo Zhao <sup>3</sup>, Fei Liu <sup>1</sup>, Kaili Fu <sup>1</sup>, Zhou Wang <sup>1</sup>, Fenglong Wang <sup>1</sup> and Jiurong Liu <sup>1</sup>

<sup>1</sup> Key Laboratory for Liquid-Solid Structural Evolution and Processing of Materials, Ministry of Education and School of Materials Science and Engineering, Shandong University, Jinan 250061, China

<sup>2</sup> Henan Joint International Research Laboratory of Nanocomposite Sensing Materials, School of Chemical and Environmental Engineering, Anyang Institute of Technology, Anyang 455000, China.

<sup>3</sup> School of Materials Science and Engineering, Qilu University of Technology (Shandong Academy of Sciences), Jinan 250353, China

\* Correspondence: wulili@sdu.edu.cn

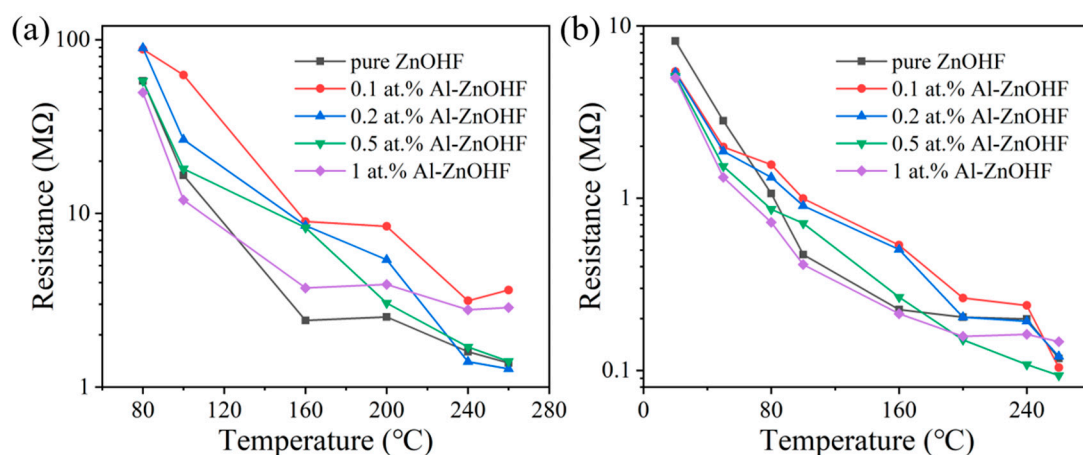

**Figure S1.** the resistance of samples at different temperature (a) without, (b) with UV radiation

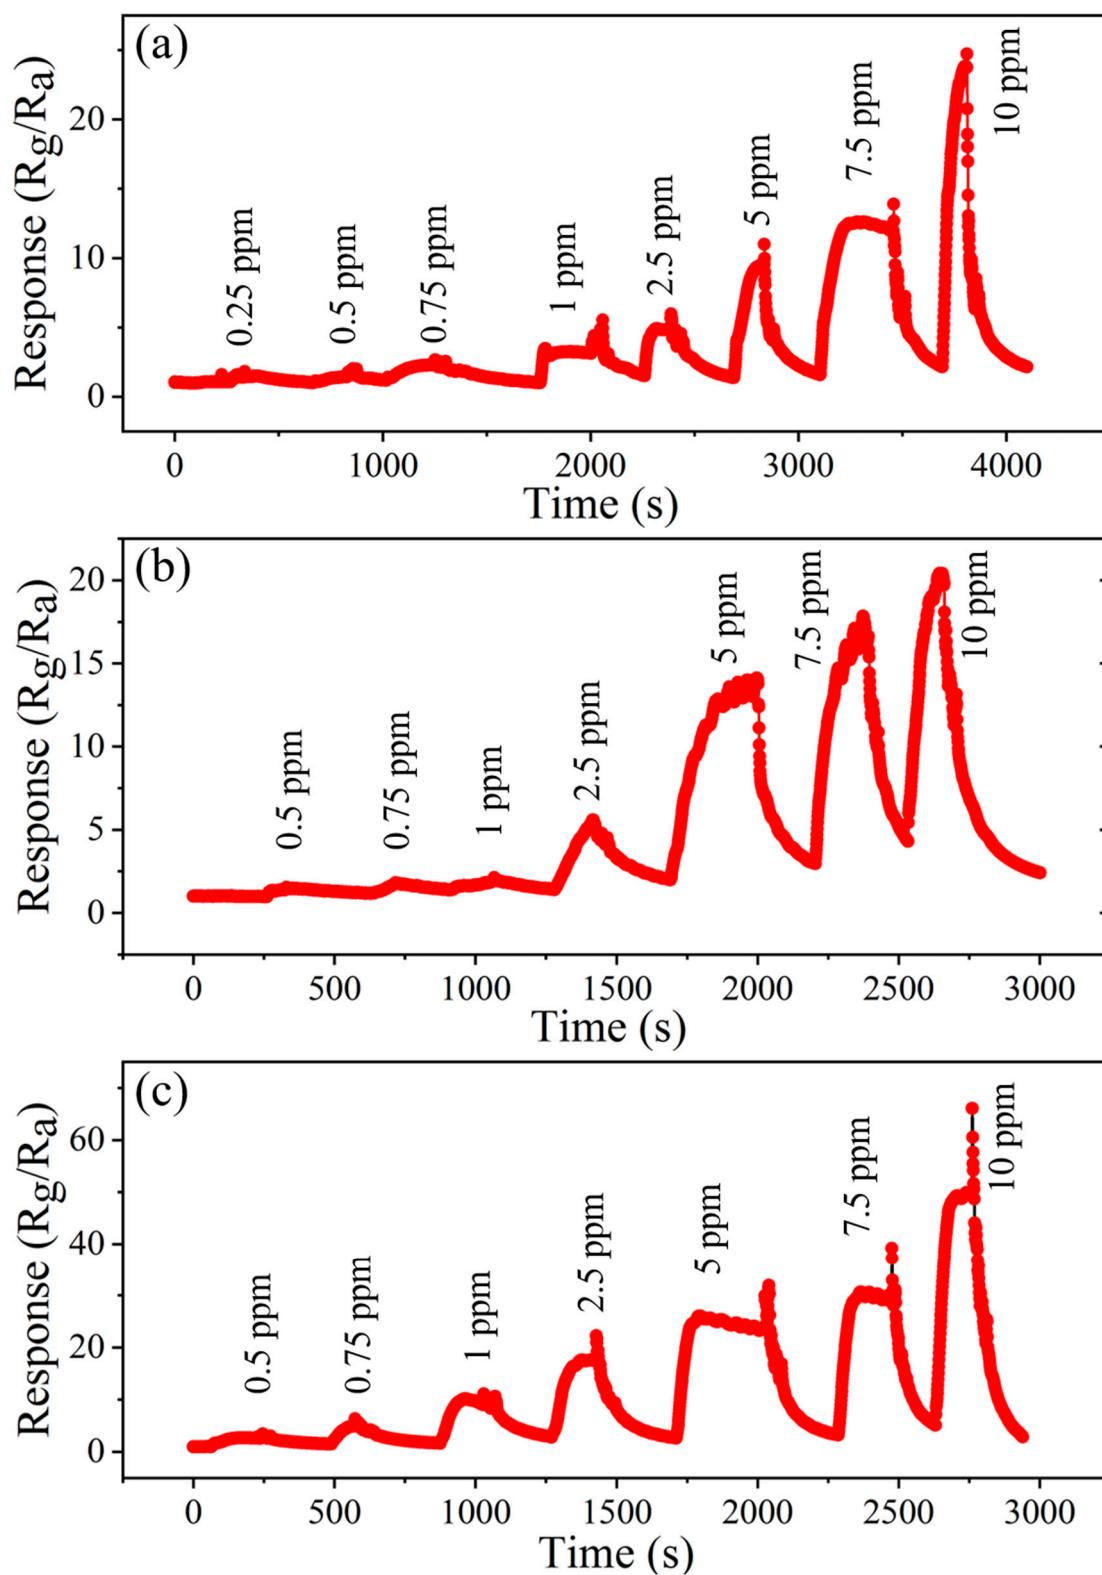

**Figure S2.** the dynamic response curve of (a) pure ZnOHF with UV assistance, 100 °C, (b) pure ZnOHF in dark, 160 °C and (c) 0.5 at.% Al-ZnOHF in dark, 160 °C
